# Supplementary material for: Gram-scale synthesis of single-atom metal–N–CNT catalysts for highly efficient CO2electroreduction
Source: Royal Society of Chemistry journal article supplement (doi:10.1039/d0cc07263j), 2021-01-01
Supplement: d0cc07263j1.pdf [file d0cc07263j1.pdf]

**Supporting information**

**Gram-scale Synthesis of Single-atom Metal-N-CNT Catalysts for Highly  
Efficient CO<sub>2</sub> Electroreduction**

Qian Sun, Wenhao Ren, Yong Zhao and Chuan Zhao \*

School of Chemistry, The University of New South Wales, Sydney, New South Wales 2052,  
Australia

\* Corresponding author. E-mail: [chuan.zhao@unsw.edu.au](mailto:chuan.zhao@unsw.edu.au)

## SI Table of Contents

|                               |    |
|-------------------------------|----|
| 1. Experimental section ..... | 1  |
| 2. Supplemental Figures ..... | 4  |
| 3. Table .....                | 14 |
| 4. References .....           | 15 |

## **1. Experimental section**

### **Chemicals**

Nickel (II) acetate tetrahydrate, manganese (II) acetate tetrahydrate, iron (II) acetate, platinum (II) chloride, ruthenium (III) chloride, zinc (II) acetate dihydrate and carbon nanotube (multi-walled) were purchased from Sigma-Aldrich Pty Ltd. Cobalt (II) acetate tetrahydrate and dimethyl sulfoxide were purchased from Ajax Finechem Pty Ltd. Copper (II) acetate monohydrate and 1,10-Phenanthroline monohydrate were purchased from BDH Chemicals. Ethanol was purchased from Chem-Supply Pty. Ltd. All reagents and solvents were of analytical grade and used as received without additional purification. The CO<sub>2</sub> and Ar feed gases were purchased from air liquide in Australia.

### **Preparation of Ni-N-CNT**

In a typical experiment of preparing 1.5 % Ni-N-CNT (1.5 wt%), multiwalled carbon nanotube (76.44 mg) was dispersed in ethanol (4 mL) with ultrasonication for 2 h to get a uniform suspension solution. At the same time, 1, 10-phenonathroline monohydrate (14.85 mg) and nickel acetate tetrahydrate (6.20 mg) (molar ratio of 3:1 for 1,10-phenanthroline: Ni) were dissolved in ethanol (2 mL) under stirring at room temperature. This solution was then added into the carbon nanotube suspension to get a mixed solution. After which, the mixed solution was heated at 60 °C for 4 h in oil-bath with stirring and then at 80 °C for 2 h to evaporate ethanol, yielding a black solid. After cooling down to room temperature, the black solid was lightly ground using a mortar and pestle, then transferred into a ceramic crucible and put in a tube furnace. The black solid was heated at 350 °C for 2 h and then 1000 °C for 2 h at a ramping rate of 5 °C/min under Ar flow, the final product was obtained and denoted as 1.5 % Ni-N-CNT. Using similar methods, x % Ni-N-CNT (x=1, 2, 2.5, 3, 3.5) was prepared.

### **Large-scale synthesis of Ni-N-CNT**

Large-scale synthesis of Ni-N-CNT was carried out using the same procedures as for 1.5 % Ni-N-CNT but with different mass of the reactants: multiwalled carbon nanotube (1528.8 mg), 1, 10-phenonathroline monohydrate (297 mg), nickel acetate tetrahydrate (124 mg). The obtained final product Ni-N-CNT with 1.5 wt% Ni loading was 1535.2 mg with high yield of 78.74 % (the yield was calculated as the ratio of the mass of final product Ni-N-CNT to the total mass of multiwalled carbon nanotube, 1, 10-phenonathroline monohydrate, and nickel acetate tetrahydrate), which confirmed the mass-production of Ni-N-CNT.

### **Preparation of CNT-N, CNT-Ni, and CNT**

CNT-N and CNT-Ni were prepared using same steps for 1.5 % Ni-N-CNT but

without introducing nickel acetate tetrahydrate and 1, 10-phenonathroline monohydrate. CNT was heated at 350 °C for 2 h and then 1000 °C for 2 h at a ramping rate of 5 °C/min under Ar flow.

#### **Preparation of 1.5 % Mn-N-CNT, 1.5 % Fe-N-CNT, 1.5 % Co-N-CNT and 1.5 % Zn-N-CNT**

Different metal salts (manganese (II) acetate tetrahydrate, iron (II) acetate, cobalt (II) acetate tetrahydrate and zinc (II) acetate dihydrate) and 1,10-phenanthroline monohydrate were used. Keep the molar ratio of 1,10-phenanthroline: metal be 3:1. Preparation procedures were the same as that for 1.5% Ni-N-CNT.

#### **Preparation of 1.5 % Cu-N-CNT, 1.5 % Ru-N-CNT and 1.5 % Pt-N-CNT**

Metal precursors copper (II) acetate monohydrate, ruthenium (III) chloride and platinum (II) chloride, and nitrogen precursor 1,10-phenanthroline monohydrate were employed to prepare these catalysts. Synthetic steps were same as that for 1.5% Ni-N-CNT, except that DMSO rather than ethanol was used. Because of higher boiling point of DMSO, the solvent was evaporated at 190 °C.

#### **Catalyst characterizations**

The details of structure and morphology of the fabricated materials were investigated X-ray diffractometer (Rigaku MiniFlex), X-ray photoelectron spectroscopy (Thermo Scientific ESCALAB 250Xi), ICP-OES and scanning electron microscope (SEM, JSM-7001F, and QUANTA 450). Aberration-corrected high-angle annular dark-field scanning transmission electron microscopy (HAADF-STEM) and Energy-dispersive X-ray spectroscopy (EDS) were obtained from JEOL JEM-ARM200F.

#### **Electrochemical measurements**

A three-electrode sealed H-type cell was employed for all electrochemical tests. Catalysts (5 mg) were introduced in a solution of H<sub>2</sub>O (150 μL), ethanol (50 μL), and 5 wt% Nafion solution (50 μL). After sonication for 2 h, a uniform catalyst ink was obtained. Then, the ink was dropped onto a polished glassy carbon and dried in air, giving a working electrode with catalyst loading of 0.5-1 mg cm<sup>-2</sup>. The reference and counter electrodes were a saturated calomel electrode (SCE) electrode and a Pt wire. All LSV and potentiostatic data were collected in 0.5 M KHCO<sub>3</sub> and corrected with 90 % IR compensation. All potentials were calculated using the Nernst equation:

$$E_{\text{RHE}} = E_{\text{SCE}} + 0.0591 \times \text{pH} + 0.241 \text{ V (25 } ^\circ\text{C)}$$

The products and Faradic efficiency of CO<sub>2</sub> electroreduction were measured by chronoamperometry at fixed potentials. The gaseous products were quantified by a gas chromatograph with a flame ionization detector (FID) for CO and CH<sub>4</sub> and a

thermal conductivity detector for H<sub>2</sub> quantification. The carrier gas was ultrapure Ar (99.999%). The CO<sub>2</sub> flow rate was 20 sccm controlled by a Cole-Parmer mass flow meter.

The faradaic efficiencies were calculated as the following:

$$FE_{CO} = \frac{0.1315 \times V_{CO_2} \times \left( \frac{0.015039 A_{CO}}{1000000} \right)}{I_{total}} \times 100\%$$

$$FE_{H_2} = \frac{0.1315 \times V_{CO_2} \times \left( \frac{10.87417 A_{H_2} - 36.35039}{1000000} \right)}{I_{total}} \times 100\%$$

V<sub>CO2</sub>: flow rate (sccm)

A<sub>CO</sub>: integral area of CO peak tested by GC

A<sub>H2</sub>: integral area of H<sub>2</sub> peak tested by GC

I<sub>total</sub>: total current (A)

### Electrochemical active surface areas (ECSA) measurements

The ECSA is proportional to double-layer capacitance (C<sub>dl</sub>) values. C<sub>dl</sub> was determined in H-type cell by measuring the capacitive current associated with double-layer charging from the scan-rate dependence of cyclic voltammetry (CV). The CV ranged from -0.5 to -0.6 V vs SCE. The scan rates were 10, 20, 40, 60, 80 and 100 mV/s. C<sub>dl</sub> was estimated by plotting the anodic and cathodic current density difference at -0.55 V vs SCE against the scan rates.

ECSA was calculated based on the definition:

$$ECSA = C_{dl}/C_s$$

Where C<sub>dl</sub> corresponds to the slope of the double-layer charging current vs the scan rate plot, and the value of C<sub>s</sub> we used is 40 μF cm<sup>-2</sup>.

## 2. Supplemental Figures

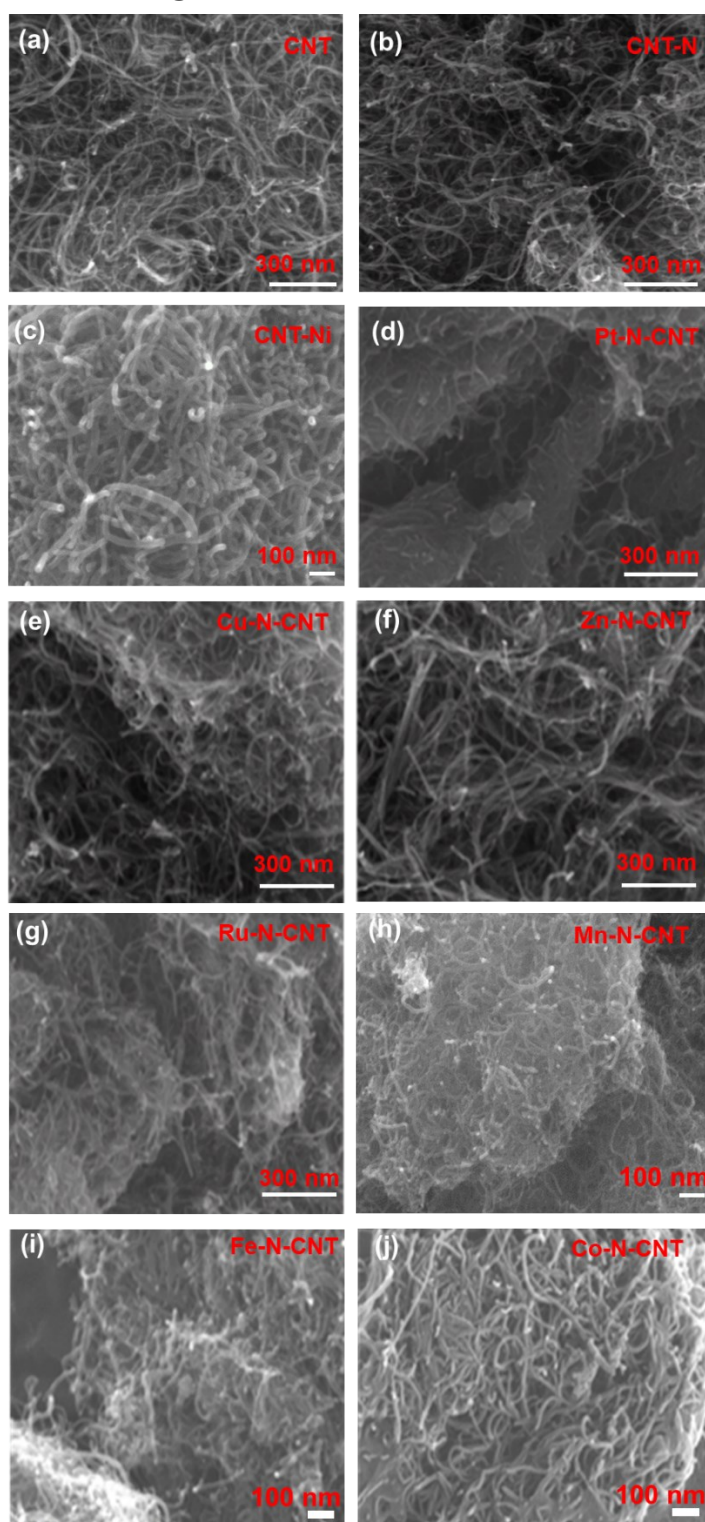

**Fig. S1** SEM images of (a) CNT, (b) CNT-N, (c) CNT-Ni, (d) Pt-N-CNT, (e) Cu-N-CNT, (f) Zn-N-CNT, (g) Ru-N-CNT, (h) Mn-N-CNT, (i) Fe-N-CNT, (j) Co-N-CNT.

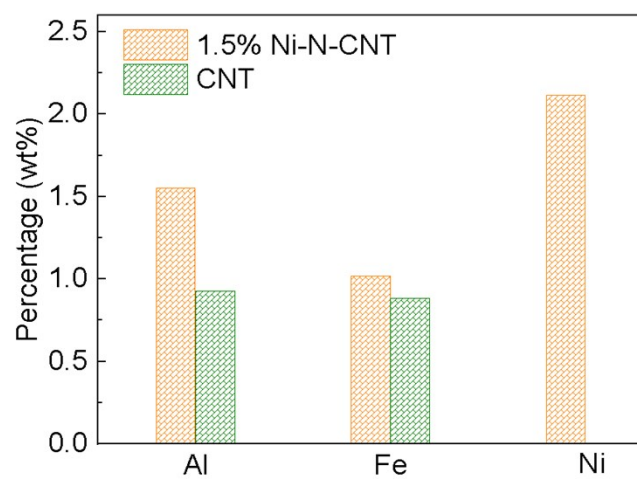

**Fig. S2** ICP data for 1.5% Ni-N-CNT and CNT.

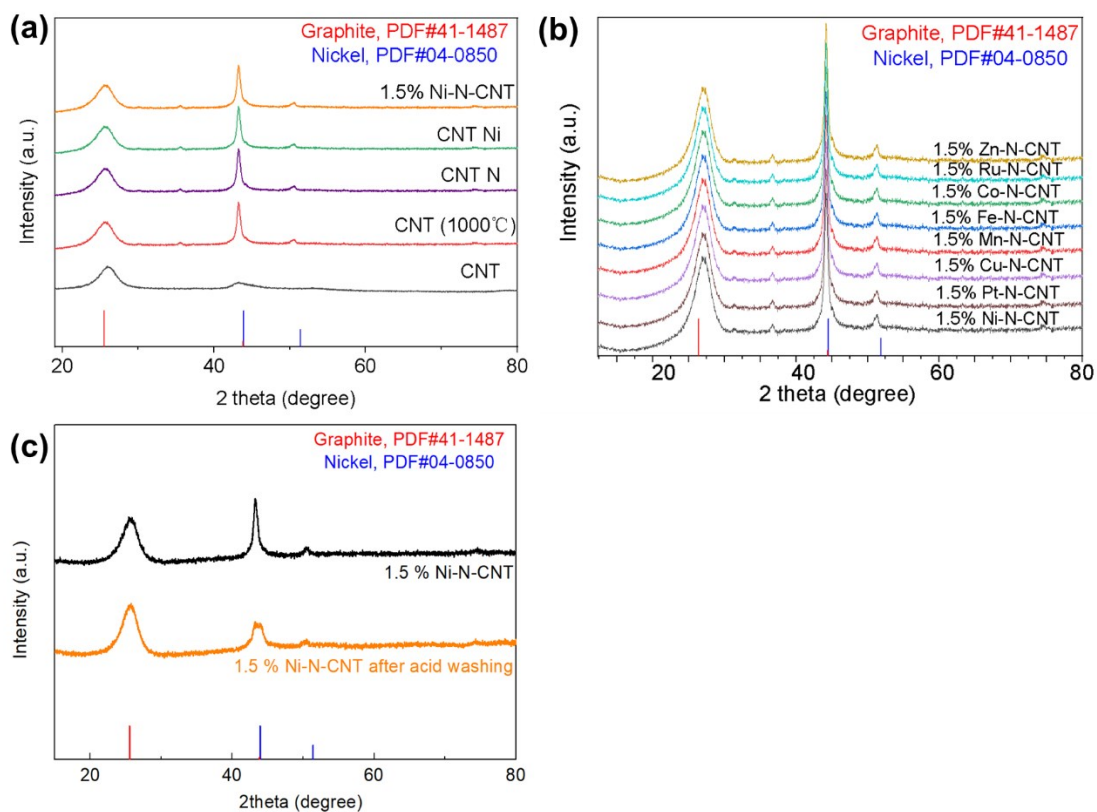

**Fig. S3** X-ray diffraction patterns of (a) 1.5% Ni-N-CNT and reference catalysts, (b) different metal single atom catalyst, and (c) 1.5 % Ni-N-CNT after acid washing with 3M HCl at room temperature for 8h.



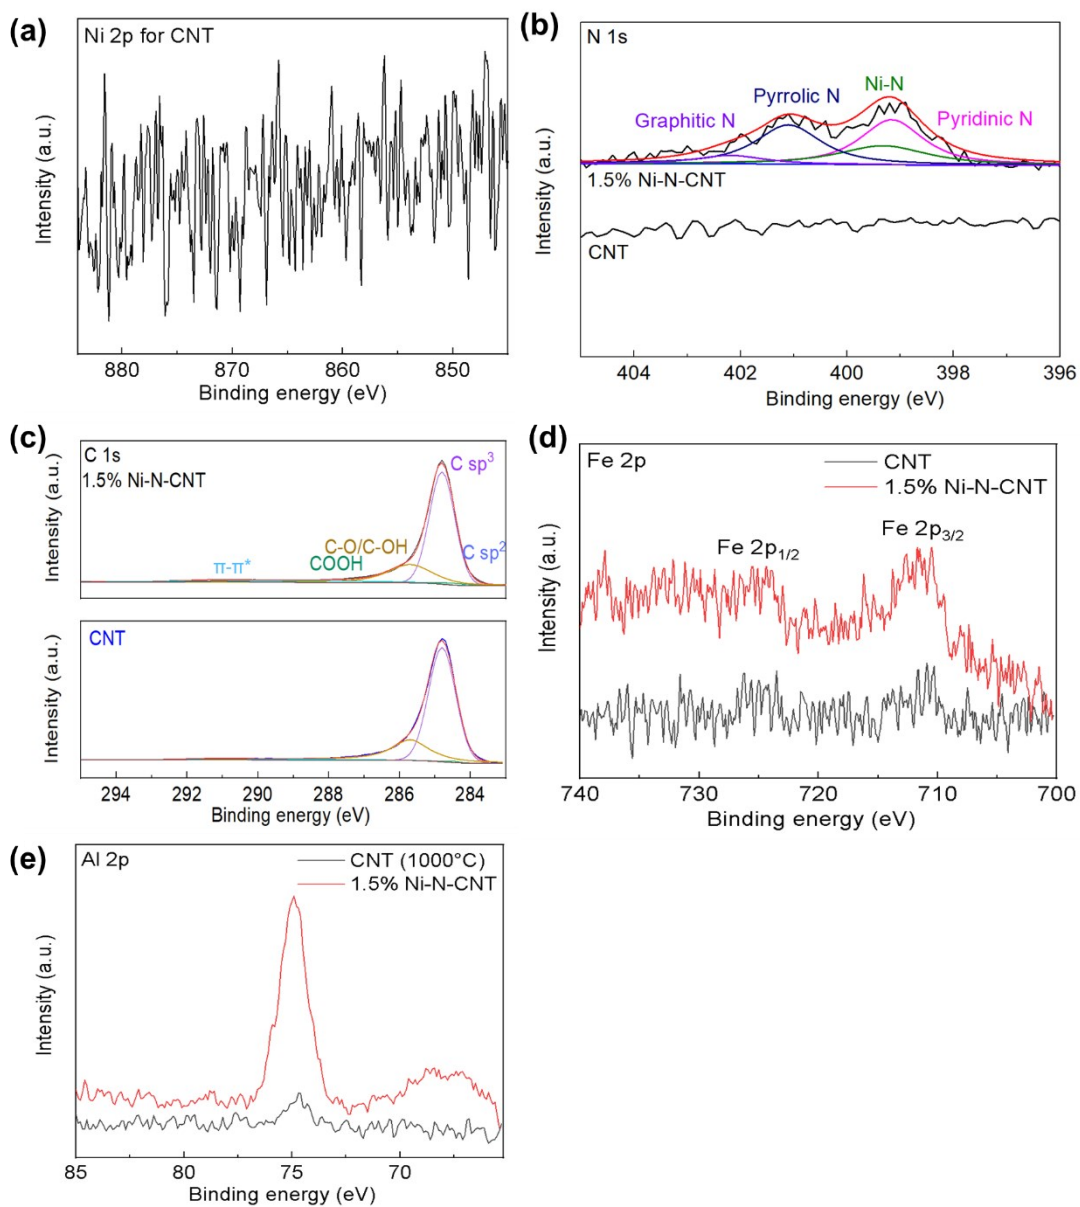

**Fig. S4** X-ray spectroscopy of (a) Ni 2p XPS spectrum of CNT, (b) N 1s XPS spectrum, (c) C 1s XPS spectrum, (d) Fe 2p XPS spectrum and (e) Al 2p XPS spectrum of 1.5% Ni-N-CNT and CNT.

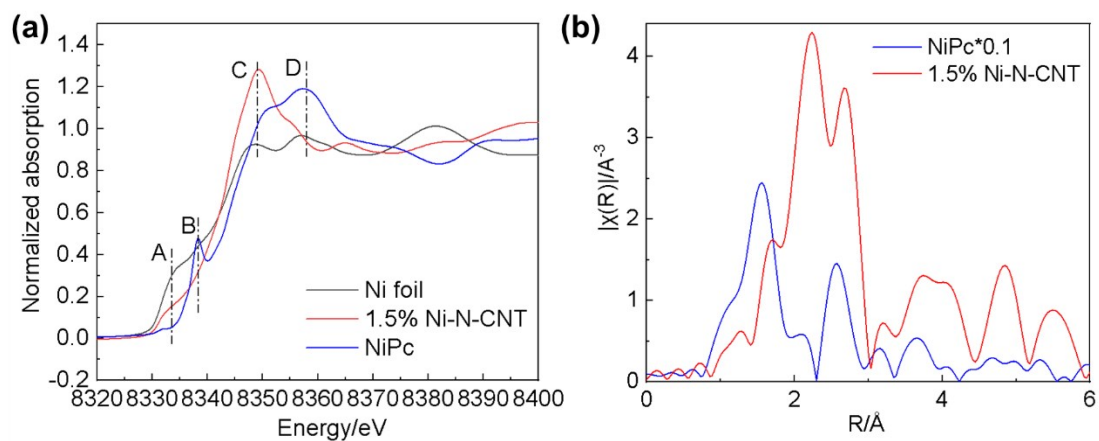

**Fig. S5** (a) Ni K-edge XANES spectra of Ni foil, NiPc, and 1.5%Ni-N-CNT. (b) Fourier transformation of the EXAFS spectra at R space.

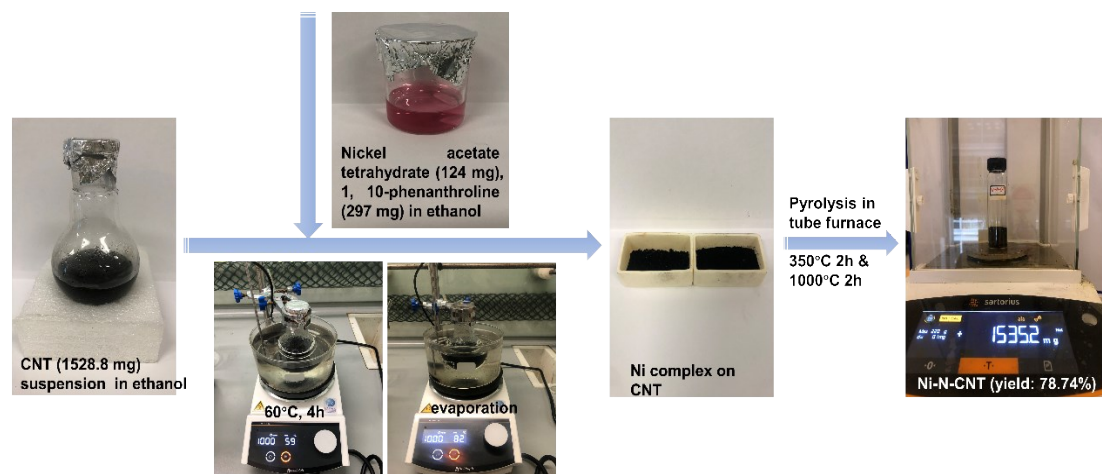

**Fig. S6** Synthetic route for preparing Ni-N-CNT at large-scale.

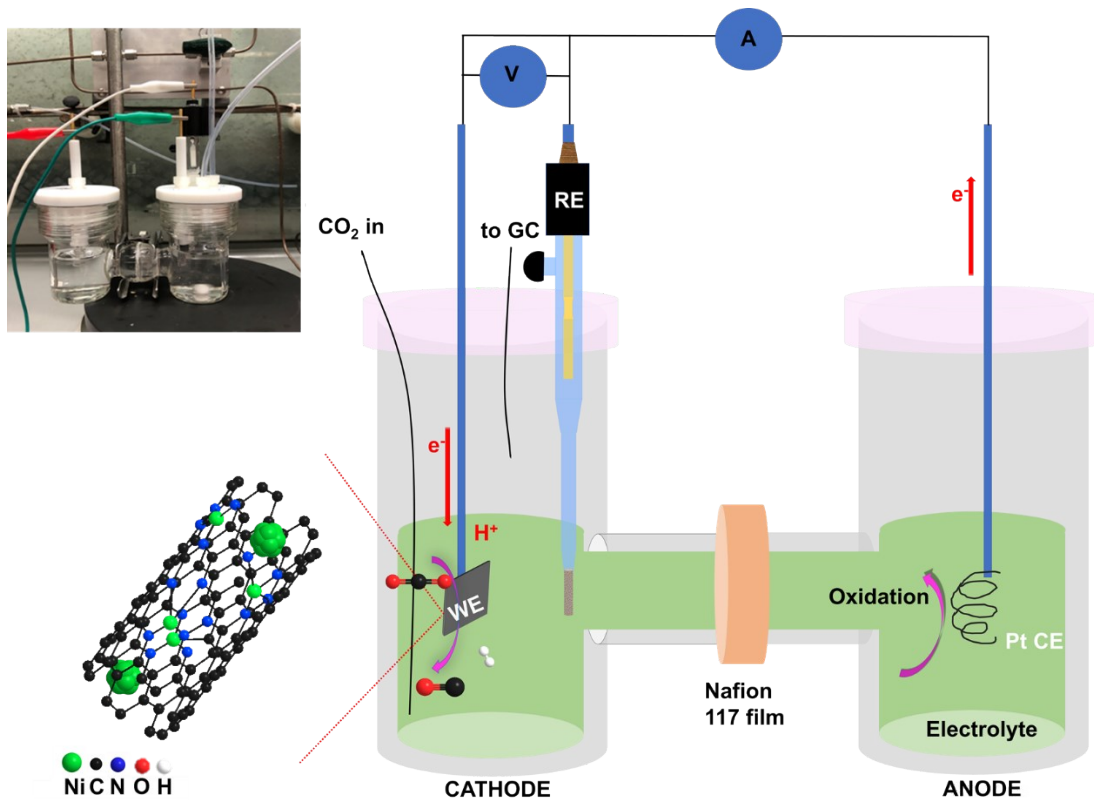

Fig. S7 Schematic of CO<sub>2</sub> electrolysis in H-cell.

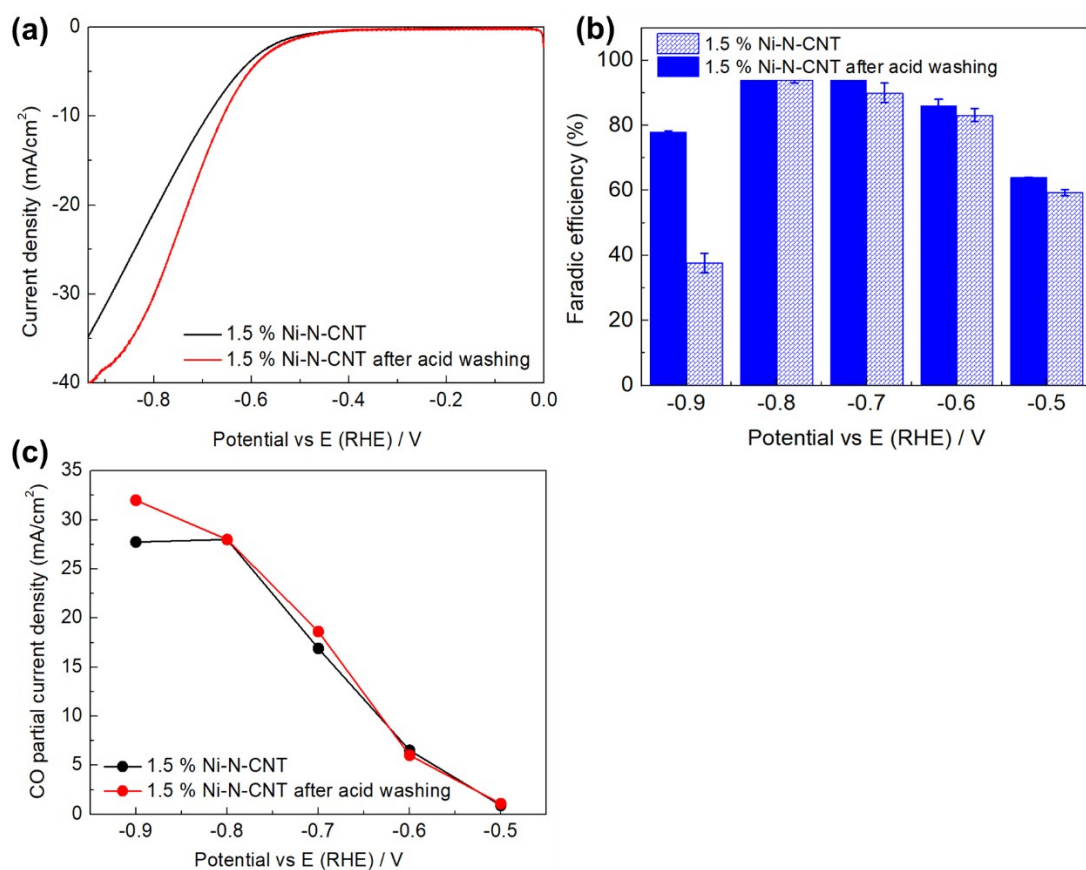

**Fig. S8** (a) LSV, (b) FE<sub>CO</sub>, and (c) CO partial current density of 1.5 % Ni-N-CNT and 1.5 % Ni-N-CNT after acid washing with 3M HCl at room temperature for 8h.

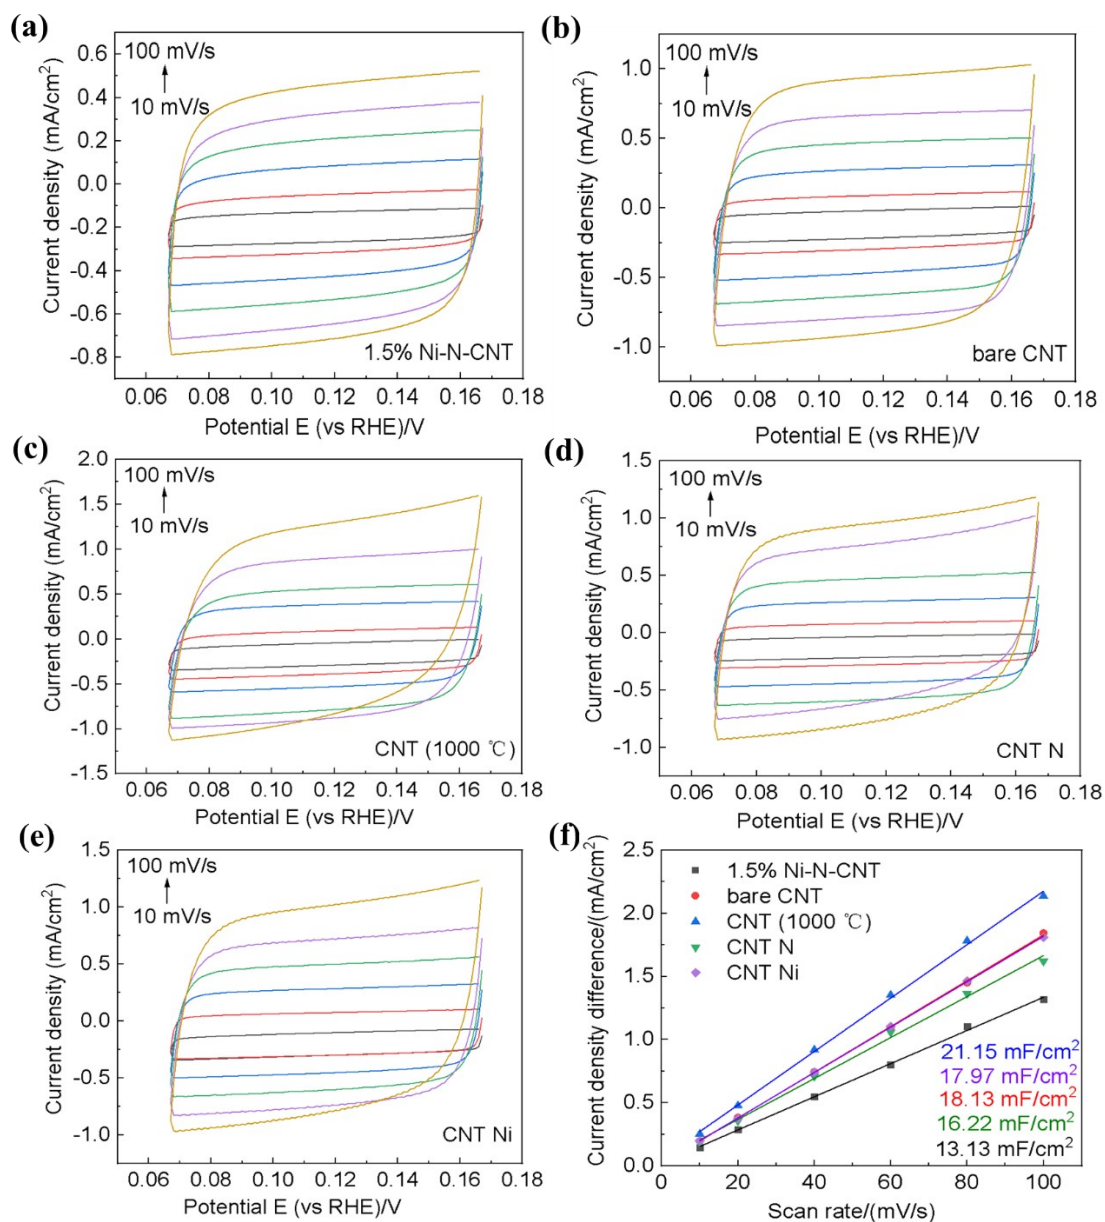

**Fig. S9** CVs of (a) 1.5% Ni-N-CNT, (b) bare CNT, (c) CNT, (d) CNT N, and (e) CNT Ni with various scan rates (10-100 mV/s) in the region of 0.067 to 0.167 V vs. RHE. (f) Charging current density differences plotted against scan rates for these samples.



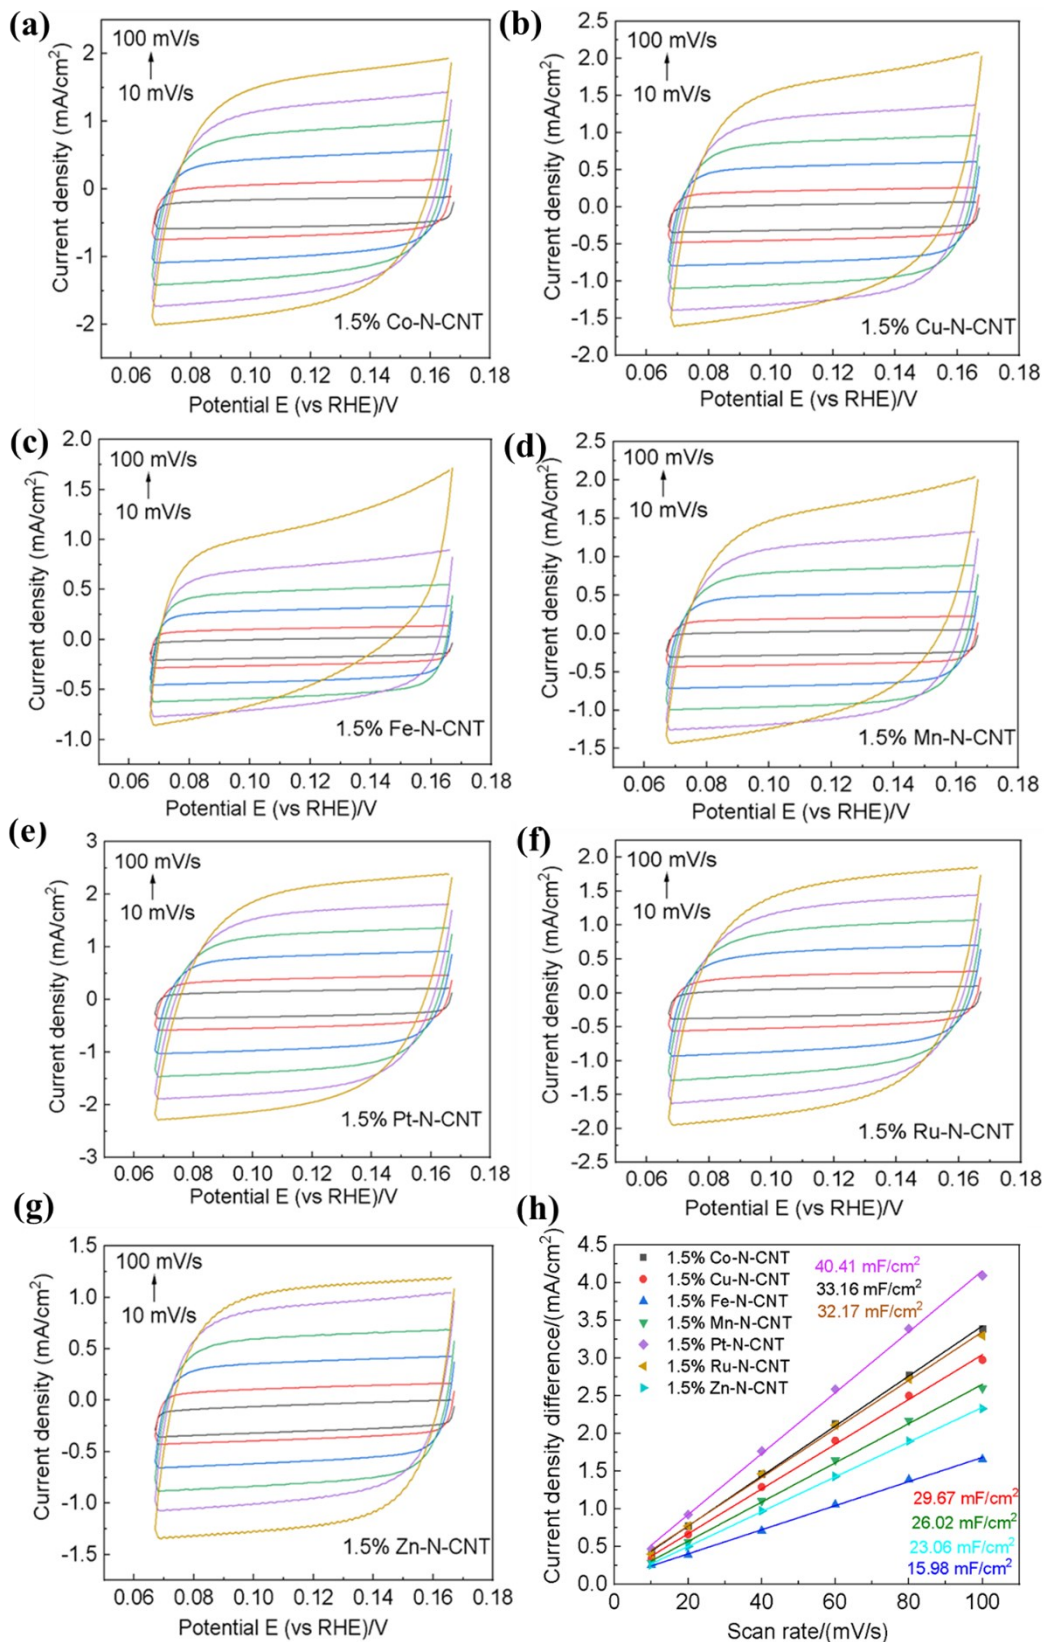

**Fig. S10** CVs of (a) 1.5% Co-N-CNT, (b) 1.5% Cu-N-CNT, (c) 1.5% Fe-N-CNT, (d) 1.5% Mn-N-CNT, (e) 1.5% Pt-N-CNT, (f) 1.5% Ru-N-CNT, and (g) 1.5% Zn-N-CNT with various scan rates (10-100 mV/s) in the region of 0.067 to 0.167 V vs. RHE. (h) Charging current density differences plotted against scan rates for these samples.

### 3. Table

**Table S1** Comparison of different catalysts for the CO<sub>2</sub>RR performance towards CO

| Materials                            | Electrolyte             | Cell   | <i>E</i> /V<br>vs.<br>RHE | FE/% | <i>J</i> /mA cm <sup>-2</sup>     | Ref.      |
|--------------------------------------|-------------------------|--------|---------------------------|------|-----------------------------------|-----------|
| Ni-N-CNT                             | 0.5 M KHCO <sub>3</sub> | H-cell | -0.8                      | 94   | 28                                | This work |
| Ni-N-C                               | 0.5 M KHCO <sub>3</sub> | H-cell | -0.9                      | 71.9 | 10.48                             | 1         |
| Ni-N-CNT                             | 0.5 M KHCO <sub>3</sub> | H-cell | -0.7                      | 91.3 | 23.5                              | 2         |
| Ni-N-MEGO                            | 0.5 M KHCO <sub>3</sub> | H-cell | -0.7                      | 92.1 | 26.8                              | 3         |
| Ni-N-Graphene                        | 0.5 M KHCO <sub>3</sub> | H-cell | -0.68                     | 92   | 10.2                              | 4         |
| Ni-N-Gr                              | 0.1 M KHCO <sub>3</sub> | H-cell | -0.8                      | 90   | -                                 | 5         |
| Ni-NG                                | 0.5 M KHCO <sub>3</sub> | H-cell | -0.62                     | 95   | ~11                               | 6         |
| A-Ni-NSG                             | 0.5 M KHCO <sub>3</sub> | H-cell | -0.8                      | ~90  | 22.5 mA cm <sup>-2</sup> @ 0.72 V | - 7       |
| A-Ni-NG                              | 0.5 M KHCO <sub>3</sub> | H-cell | -0.8                      | ~90  | -                                 | 7         |
| NC-CNTs                              | 0.1 M KHCO <sub>3</sub> | H-cell | -0.8                      | ~90  | -                                 | 8         |
| Ni-CNT-CONH                          | 0.5 M KHCO <sub>3</sub> | H-cell | -0.65                     | 98   | 18.6                              | 9         |
| Ni-CNT-PP                            | 0.5 M KHCO <sub>3</sub> | H-cell | -0.65                     | 96   | 13.4                              | 9         |
| Ni-N-RGO                             | 0.5 M KHCO <sub>3</sub> | H-cell | -0.8                      | 97   | 5 mA cm <sup>-2</sup> @ -0.71 V   | 10        |
| Ni-N-C                               | 0.1 M KHCO <sub>3</sub> | H-cell | -0.78                     | 85   | -                                 | 11        |
| NiSA-NGA                             | 0.5 M KHCO <sub>3</sub> | H-cell | -0.8                      | 90.2 | -                                 | 12        |
| NiN-GS                               | 0.1 M KHCO <sub>3</sub> | H-cell | -0.8                      | 93   | -                                 | 13        |
| SANi-GO                              | 0.5 M KHCO <sub>3</sub> | H-cell | -0.63                     | 96.5 | 8.3                               | 14        |
| Ni/NC                                | 0.1 M KHCO <sub>3</sub> | H-cell | -0.9                      | 96.5 | 12.6 mA cm <sup>-2</sup> @ -1.2 V | 15        |
| Ni/NC                                | 0.1 M KHCO <sub>3</sub> | H-cell | -0.8                      | 92.3 | 4                                 | 16        |
| Ni SAC                               | 0.5 M KHCO <sub>3</sub> | H-cell | -0.65                     | 95.2 | >15                               | 17        |
| Ni <sub>IMP</sub> /NC <sub>923</sub> | 0.1 M KHCO <sub>3</sub> | H-cell | -0.6                      | 82   | -                                 | 18        |



## 4. References

- 1 C. M. Zhao, X. Y. Dai, T. Yao, W. X. Chen, X. Q. Wang, J. Wang, J. Yang, S. Q. Wei, Y. Wu and Y. D. Li, *J. Am. Chem. Soc.*, 2017, **139**, 8078.
- 2 Y. Cheng, S. Y. Zhao, B. Johannessen, J. P. Veder, M. Saunders, M. R. Rowles, M. Cheng, C. Liu, M. F. Chisholm, R. D. Marco and H. M. Cheng, *Adv. Mater.*, 2018, **30**, 1706287.
- 3 Y. Cheng, S. Y. Zhao, H. B. Li, S. He, J. P. Veder, B. Johannessen, J. P. Xiao, S. F. Lu, J. Pan, M. F. Chisholm, S. Z. Yang, C. Liu, J. G. Chen and S. P. Jiang, *Appl. Catal. B*, 2019, **243**, 294.
- 4 W. T. Bi, X. G. Li, R. You, M. L. Chen, R. L. Yuan, W. X. Huang, X. J. Wu, W. S. Chu, C. Z. Wu and Y. Xie, *Adv. Mater.*, 2018, **30**, 1706617.
- 5 P. P. Su, K. Iwase, S. Nakanishi, K. Hashimoto and K. Kamiya, *Small*, 2016, **12**, 6083.
- 6 K. Jiang, S. Siahrostami, T. T. Zheng, Y. F. Hu, S. Hwang, E. Stavitski, Y. Peng, J. Dynes, M. Gangisetty, D. Su, K. Attenkofer and H. T. Wang, *Energy Environ. Sci.*, 2018, **11**, 893.
- 7 H. B. Yang, S. F. Hung, S. Liu, K. D. Yuan, S. Miao, L. P. Zhang, X. Huang, H. Y. Wang, W. Z. Cai, R. Chen, J. J. Gao, X. F. Yang, W. Chen, Y. Q. Huang, H. M. Chen, C. M. Li, T. Zhang and B. Liu, *Nat. Energy*, 2018, **3**, 140.
- 8 Q. Fan, P. F. Hou, C. Choi, T. S. Wu, S. Hong, F. Li, Y. L. Soo, P. Kang, Y. Jung, Z. Sun, *Adv. Energy Mater.*, 2019, 1903068.
- 9 S. Liu, H. B. Yang, S. F. Hung, J. Ding, W. Cai, L. Liu and Y. Huang, *Angew. Chem. Int. Ed.*, 2019, **59**, 798.
- 10 H. Y. Jeong, M. Balamurugan, V. S. K. Choutipalli, J. Jo, H. Baik, V. Subramanian, M. Kim, U. Sim and K. T. Nam, *Chem. Eur. J*, 2018, **24**, 18444.
- 11 W. Ju, A. Bagger, G. P. Hao, A. S. Varela, I. Sinev, V. Bon, B. R. Cuenya, S. Kaskel, J. Rossmeisl and P. Strasser, *Nat. Commun.*, 2017, **8**, 1.
- 12 K. W. Mou, Z. P. Chen, X. X. Zhang, M. Y. Jiao, X. P. Zhang, X. Ge, W. Zhang, L. C. Liu, *Small*, 2019, **15**, 1903668.
- 13 K. Jiang, G. X. Chen and H. T. Wang, *J. Vis. Exp.*, 2018, **134**, e57380.
- 14 S. Y. Zhao, G. X. Chen, G. M. Zhou, L. C. Yin, J. P. Veder, B. Johannessen, M. Saunders, S. Z. Yang, R. D. Marco, C. Liu and S. P. Jiang, *Adv. Funct. Mater.*, 2019, **30**, 1906157.
- 15 M. L. Zhang, T. S. Wu, S. Hong, Q. Fan, Y. L. Soo, J. Masa, J. S. Qiu and Z. Y. Sun, *ACS Sustain. Chem. Eng.*, 2019, **7**, 15030.
- 16 F. Li, S. Hong, T. S. Wu, X. Li, J. Masa, Y. L. Soo and Z. Y. Sun, *ACS Appl. Energy Mater.*, 2019, **2**, 8836.
- 17 W. L. Zhu, J. J. Fu, J. Liu, Y. Chen, X. Li, K. K. Huang, Y. M. Cai, Y. M. He, Y. Zhou, D. Su, J. J. Zhu and Y. H. Lin, *Appl. Catal. B*, 2020, **264**, 118502.
- 18 S. Büchele, A. J. Martín, S. Mitchell, F. Krumeich, S. M. Collins, S. Xi, A. Borgna and J. P. Ramírez, *ACS Catal.*, 2020, **10**, 3444.
